# Supplementary material for: Gene Profiles in the Early Stage of Neuronal Differentiation of Mouse Bone Marrow Stromal Cells Induced by Basic Fibroblast Growth Factor
Source: Hindawi journal article supplement (doi:10.1155/2020/8857057), 2020-12-24
Supplement: f1 [file 8857057.f1.pdf]

Supplemental data 1

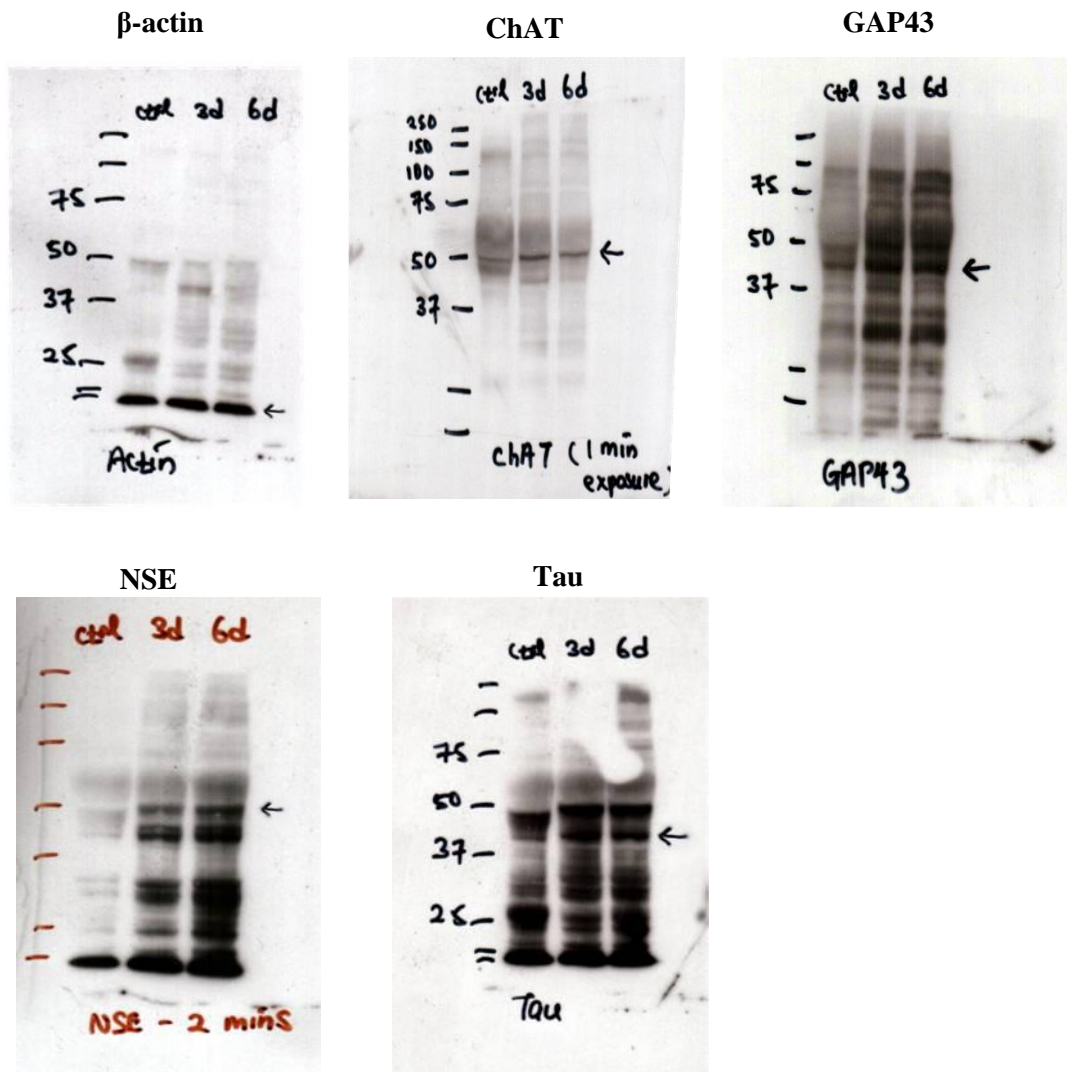

Full unedited western blot images data in Figure 3C.

Supplemental data 2

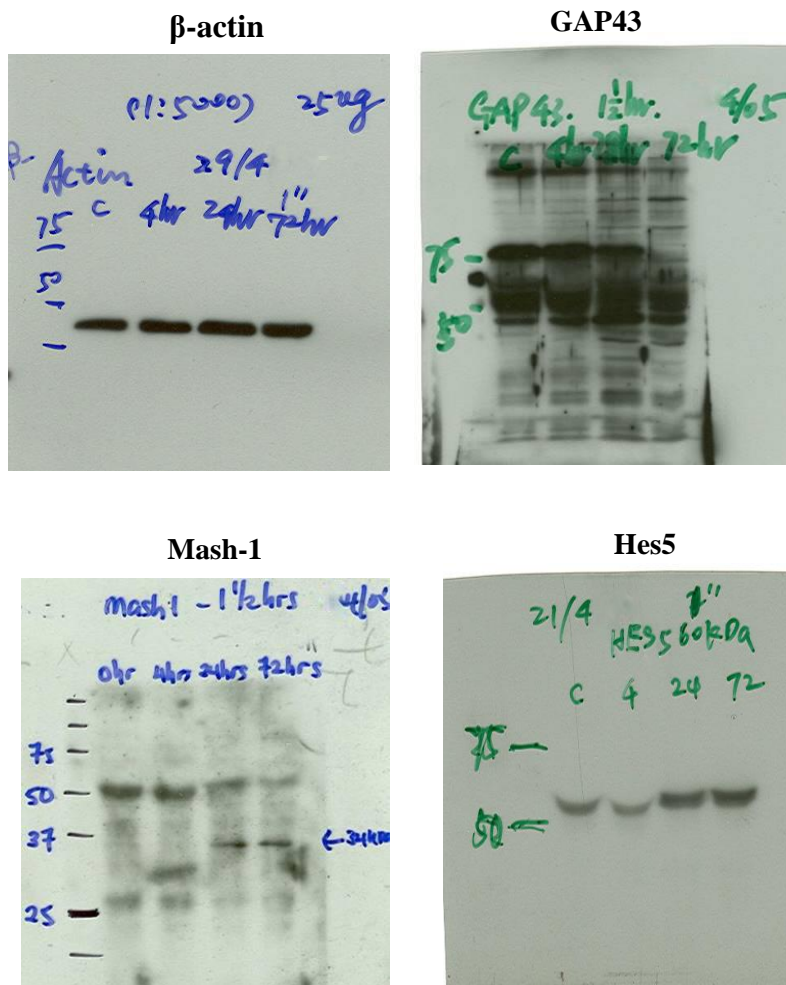

Full unedited western blot images data in Figure 6A.
